# Supplementary material for: Genetically determined serum bilirubin level and the risk of heart failure: A mendelian randomization study
Source: Front Genet. 2023 Jan 13;14:1067146. doi: 10.3389/fgene.2023.1067146 (PMC9881886; doi:10.3389/fgene.2023.1067146)
Supplement: Supplementary file 1 [file Table2.XLSX]

## Sheet: STable 1
Supplementary Table 5. Results for MR analysis on stroke as a positive control outcome
Population	Exposure	Outcome	Sample overlapping	Number of SNPs	OR (95% CI)	P value
European	Bilirubin(UK biobank)	Stroke(FinnGen cohort)	0	85	0.94 (0.89-1.00)	0.03
East Asian	Bilirubin(KoGES)	Stroke(Biobank Japan)	0	9	0.77 (0.62-0.97)	0.02

## Sheet: STable 2
Supplementary Table 1. Summary statistics for the SNPs associated with bilirubin and their association with HF in the HERMES consortium.
						Bilirubin		HF
SNP	Chr	Position	Effect allele	Other allele	EAF	Beta	SE	Beta	SE	F statistic
rs10003923	4	175086079	C	T	0.4207	0.015	0.003	-0.0038	0.008	24.9998
rs1047891	2	211540507	A	C	0.3063	0.023	0.003	-0.0156	0.0087	58.7774
rs1052618	3	136574501	A	G	0.3078	0.028	0.003	-0.0223	0.0085	87.1106
rs10832027	11	13357183	G	A	0.3236	0.024	0.003	-0.013	0.0085	63.9996
rs11079420	17	59253051	A	G	0.7827	0.02	0.003	-0.0182	0.0095	44.4442
rs1126673	4	100045616	C	T	0.3071	0.02	0.003	0.0089	0.0085	44.4442
rs115558925	4	69765782	A	C	0.9112	0.029	0.004	0.0051	0.0143	52.5622
rs117113213	20	39165692	G	A	0.9582	0.046	0.007	-0.014	0.0236	43.1834
rs11727331	4	145091680	A	G	0.0587	0.04	0.006	-0.0066	0.0196	44.4442
rs11753995	6	160575366	G	A	0.8319	0.025	0.003	-0.0202	0.0105	69.444
rs11917973	3	195838613	T	C	0.4416	0.014	0.003	-0.012	0.008	21.7776
rs12210538	6	110760008	G	A	0.23	0.017	0.003	-0.0016	0.0095	32.1109
rs12515233	5	158417109	C	A	0.1716	0.019	0.003	-0.0051	0.0105	40.1109
rs12601919	17	65825374	A	G	0.8048	0.021	0.003	-0.0082	0.0118	48.9997
rs12768009	10	96525865	G	A	0.8558	0.024	0.004	0.0183	0.0113	35.9998
rs13030095	2	26026598	A	G	0.289	0.015	0.003	-0.0062	0.0086	24.9998
rs13092376	3	196516288	C	A	0.409	0.014	0.003	-0.0017	0.008	21.7776
rs139763750	14	51049397	A	G	0.0591	0.038	0.006	0.0211	0.0168	40.1109
rs1482852	3	156798294	A	G	0.6061	0.017	0.003	0.0111	0.0081	32.1109
rs1490384	6	126851160	C	T	0.5011	0.019	0.003	0.0034	0.0079	40.1109
rs151450	4	88016514	G	A	0.6094	0.017	0.003	0.005	0.008	32.1109
rs157595	19	45425460	G	A	0.6127	0.017	0.003	0.0065	0.0086	32.1109
rs17184256	15	63785421	G	A	0.3109	0.022	0.003	-0.0015	0.0085	53.7774
rs174554	11	61579463	A	G	0.6466	0.021	0.003	0.0191	0.0082	48.9997
rs17476364	10	71094504	C	T	0.0984	0.091	0.004	0.0033	0.0136	517.559
rs17513135	1	40035686	C	T	0.7631	0.018	0.003	-0.0032	0.0093	35.9998
rs1762486	1	107627697	A	G	0.6689	0.02	0.003	-0.0208	0.0084	44.4442
rs1800961	20	43042364	T	C	0.0373	0.062	0.007	0.0097	0.0215	78.4485
rs181207	16	28513530	C	T	0.6569	0.02	0.003	-0.0091	0.0084	44.4442
rs1874121	1	220969049	T	C	0.3462	0.023	0.003	0.008	0.0083	58.7774
rs198851	6	26104632	T	G	0.1404	0.047	0.003	0.008	0.0114	245.443
rs2245095	10	122857596	C	T	0.9105	0.048	0.004	0.0109	0.014	143.999
rs2267846	3	48556339	A	G	0.2766	0.017	0.003	0.0101	0.0089	32.1109
rs2375279	1	25541931	C	T	0.8425	0.022	0.004	-0.0232	0.0109	30.2498
rs2395943	6	42940673	A	G	0.4118	0.02	0.003	0.0008	0.008	44.4442
rs247827	16	84582825	G	A	0.8162	0.019	0.003	0.0066	0.0102	40.1109
rs2519093	9	136141870	C	T	0.8129	0.024	0.003	-0.0566	0.0102	63.9996
rs2657879	12	56865338	G	A	0.173	0.018	0.003	-0.0244	0.0106	35.9998
rs274555	5	131722951	C	T	0.5761	0.018	0.003	-0.0141	0.0081	35.9998
rs2901610	10	94536864	C	T	0.4702	0.022	0.003	-0.0121	0.0079	53.7774
rs2968478	16	88858646	T	G	0.4202	0.023	0.003	0.0059	0.0082	58.7774
rs3118753	9	97051962	C	T	0.6013	0.014	0.003	-0.0024	0.008	21.7776
rs3184504	12	111884608	T	C	0.4597	0.038	0.003	0.0409	0.008	160.443
rs33963055	8	23407178	T	C	0.1708	0.019	0.003	0.0019	0.0104	40.1109
rs339969	15	60883281	C	A	0.3673	0.026	0.003	0.0019	0.0081	75.1106
rs34664882	8	41543675	A	G	0.0326	0.076	0.007	0.0203	0.0229	117.877
rs34755157	9	137113606	C	T	0.8101	0.023	0.003	0.0103	0.0105	58.7774
rs3741298	11	116657561	C	T	0.2012	0.032	0.003	0.0197	0.0098	113.777
rs379149	17	76126586	C	T	0.8729	0.027	0.004	0.0079	0.0127	45.5622
rs4149056	12	21331549	C	T	0.1633	0.183	0.003	-0.0101	0.0107	3720.98
rs4410790	7	17284577	T	C	0.3633	0.031	0.003	-0.004	0.0082	106.777
rs4671605	2	64887382	T	C	0.7285	0.021	0.003	0.0068	0.009	48.9997
rs4760682	12	48512285	C	A	0.1901	0.017	0.003	0.007	0.0102	32.1109
rs4820091	22	21940189	T	G	0.7969	0.018	0.003	-0.001	0.0099	35.9998
rs499974	11	75455021	A	C	0.1759	0.029	0.003	-0.0057	0.012	93.4439
rs556107	1	234853059	T	C	0.5391	0.021	0.003	-0.0005	0.0079	48.9997
rs55696093	7	21605973	G	A	0.21	0.026	0.003	0.0099	0.0096	75.1106
rs57720904	7	28180099	C	T	0.9081	0.03	0.005	-0.0032	0.0138	35.9998
rs58699591	7	97876704	C	T	0.8413	0.023	0.003	0.0093	0.0108	58.7774
rs59616136	19	17252041	A	G	0.1058	0.036	0.004	-0.024	0.0145	80.9995
rs61791066	3	170713380	C	T	0.1243	0.031	0.004	0.0303	0.0119	60.0621
rs61984409	14	64730021	A	C	0.641	0.015	0.003	0.003	0.0081	24.9998
rs6431625	2	234637912	C	T	0.3797	0.598	0.002	0.0088	0.0094	89400.4
rs6682423	1	63171063	T	C	0.6555	0.021	0.003	0.0134	0.0082	48.9997
rs67257650	15	73979507	T	C	0.4181	0.017	0.003	0.0159	0.0079	32.1109
rs6731997	2	232560411	G	A	0.2108	0.017	0.003	0.0027	0.0097	32.1109
rs6734238	2	113841030	A	G	0.5906	0.023	0.003	-0.0034	0.008	58.7774
rs676388	19	49211969	C	T	0.5274	0.021	0.003	0.0113	0.008	48.9997
rs6869704	5	122833667	T	C	0.5451	0.017	0.003	-0.0077	0.0079	32.1109
rs6986601	8	131026260	G	A	0.5371	0.014	0.003	0.008	0.0079	21.7776
rs7135337	12	121404155	C	A	0.569	0.016	0.003	-0.031	0.0091	28.4443
rs717662	11	100493995	T	C	0.112	0.026	0.004	-0.0101	0.0125	42.2497
rs7213285	17	27206029	A	G	0.158	0.02	0.003	-0.0039	0.0107	44.4442
rs7222046	17	7806529	G	A	0.4343	0.017	0.003	-0.011	0.0079	32.1109
rs7223257	17	61787684	T	C	0.6571	0.017	0.003	0.0101	0.0082	32.1109
rs72835688	6	12811955	C	T	0.9417	0.03	0.005	-0.0028	0.0196	35.9998
rs73080739	12	20761863	G	A	0.8945	0.033	0.004	0.0028	0.013	68.0621
rs76895963	12	4384844	G	T	0.0203	0.062	0.01	0.0451	0.0341	38.4398
rs788644	1	202256962	G	T	0.5288	0.018	0.003	0.0011	0.0078	35.9998
rs79170239	9	94044272	T	C	0.1831	0.035	0.003	-0.0006	0.0101	136.11
rs79800919	4	124787383	G	A	0.8885	0.026	0.004	-0.0141	0.0124	42.2497
rs8192870	8	59412066	T	G	0.3444	0.015	0.003	0.0055	0.0083	24.9998
rs855791	22	37462936	G	A	0.5769	0.028	0.003	-0.0024	0.008	87.1106
rs857725	1	158607935	T	G	0.7304	0.033	0.003	0.0056	0.0088	120.999
rs9826148	3	114464858	C	T	0.8911	0.026	0.004	-0.0046	0.0127	42.2497

## Sheet: STable 3
Supplementary Table 2. Summary statistics for the SNPs associated with bilirubin and their association with HF in the FinnGen study.
						Bilirubin		HF
SNP	Chr	Position	Effect allele	Other allele	EAF	Beta	SE	Beta	SE	F statistic
rs10003923	4	175086079	C	T	0.4207	0.015	0.003	-0.00801	0.01047	24.9998
rs1047891	2	211540507	A	C	0.3063	0.023	0.003	-0.01747	0.01073	58.7774
rs1052618	3	136574501	A	G	0.3078	0.028	0.003	-0.01353	0.01078	87.1106
rs10832027	11	13357183	G	A	0.3236	0.024	0.003	-0.02559	0.01004	63.9996
rs11079420	17	59253051	A	G	0.7827	0.02	0.003	-0.0125	0.01252	44.4442
rs1126673	4	100045616	C	T	0.3071	0.02	0.003	0.01287	0.01086	44.4442
rs115558925	4	69765782	A	C	0.9112	0.029	0.004	-0.01053	0.02066	52.5622
rs117113213	20	39165692	G	A	0.9582	0.046	0.007	0.00649	0.02035	43.1834
rs11727331	4	145091680	A	G	0.0587	0.04	0.006	-0.0106	0.01913	44.4442
rs11753995	6	160575366	G	A	0.8319	0.025	0.003	-0.00379	0.01431	69.444
rs11917973	3	195838613	T	C	0.4416	0.014	0.003	-0.00393	0.01011	21.7776
rs12210538	6	110760008	G	A	0.23	0.017	0.003	-0.00427	0.01356	32.1109
rs12515233	5	158417109	C	A	0.1716	0.019	0.003	-0.01755	0.01372	40.1109
rs12768009	10	96525865	G	A	0.8558	0.024	0.004	-0.01851	0.01319	35.9998
rs13030095	2	26026598	A	G	0.289	0.015	0.003	-0.01203	0.01215	24.9998
rs13092376	3	196516288	C	A	0.409	0.014	0.003	-0.00493	0.01009	21.7776
rs139763750	14	51049397	A	G	0.0591	0.038	0.006	-0.01184	0.03069	40.1109
rs1482852	3	156798294	A	G	0.6061	0.017	0.003	0.01312	0.01063	32.1109
rs1490384	6	126851160	C	T	0.5011	0.019	0.003	-0.01031	0.00998	40.1109
rs151450	4	88016514	G	A	0.6094	0.017	0.003	0.00641	0.01022	32.1109
rs157595	19	45425460	G	A	0.6127	0.017	0.003	-0.01503	0.01091	32.1109
rs17184256	15	63785421	G	A	0.3109	0.022	0.003	0.00056	0.01065	53.7774
rs174554	11	61579463	A	G	0.6466	0.021	0.003	0.02071	0.01012	48.9997
rs17476364	10	71094504	C	T	0.0984	0.091	0.004	-0.00199	0.0212	517.559
rs17513135	1	40035686	C	T	0.7631	0.018	0.003	-0.00134	0.01211	35.9998
rs1762486	1	107627697	A	G	0.6689	0.02	0.003	0.00257	0.01122	44.4442
rs1800961	20	43042364	T	C	0.0373	0.062	0.007	0.02718	0.02406	78.4485
rs181207	16	28513530	C	T	0.6569	0.02	0.003	-0.01414	0.01016	44.4442
rs1874121	1	220969049	T	C	0.3462	0.023	0.003	0.0294	0.01113	58.7774
rs198851	6	26104632	T	G	0.1404	0.047	0.003	0.0236	0.01597	245.443
rs2245095	10	122857596	C	T	0.9105	0.048	0.004	0.00151	0.01441	143.999
rs2267846	3	48556339	A	G	0.2766	0.017	0.003	0.01105	0.01135	32.1109
rs2375279	1	25541931	C	T	0.8425	0.022	0.004	-0.00984	0.0125	30.2498
rs2395943	6	42940673	A	G	0.4118	0.02	0.003	-0.00968	0.01007	44.4442
rs247827	16	84582825	G	A	0.8162	0.019	0.003	-0.00913	0.01264	40.1109
rs2657879	12	56865338	G	A	0.173	0.018	0.003	0.00015	0.01296	35.9998
rs274555	5	131722951	C	T	0.5761	0.018	0.003	-0.00484	0.01004	35.9998
rs2901610	10	94536864	C	T	0.4702	0.022	0.003	0.00504	0.00999	53.7774
rs2968478	16	88858646	T	G	0.4202	0.023	0.003	0.00795	0.01016	58.7774
rs3118753	9	97051962	C	T	0.6013	0.014	0.003	0.00963	0.01017	21.7776
rs3184504	12	111884608	T	C	0.5358	0.038	0.003	0.0475	0.01015	160.443
rs33963055	8	23407178	T	C	0.1708	0.019	0.003	-0.00435	0.01248	40.1109
rs339969	15	60883281	C	A	0.3673	0.026	0.003	0.00631	0.01112	75.1106
rs34664882	8	41543675	A	G	0.0326	0.076	0.007	-0.00291	0.03951	117.877
rs34755157	9	137113606	C	T	0.8101	0.023	0.003	-0.00641	0.01265	58.7774
rs3741298	11	116657561	C	T	0.2012	0.032	0.003	-0.0002	0.01186	113.777
rs379149	17	76126586	C	T	0.8729	0.027	0.004	0.00478	0.01507	45.5622
rs4149056	12	21331549	C	T	0.1633	0.183	0.003	-0.00525	0.01249	3720.98
rs4410790	7	17284577	T	C	0.3633	0.031	0.003	-0.01159	0.01061	106.777
rs4671605	2	64887382	T	C	0.7285	0.021	0.003	-0.01022	0.01188	48.9997
rs4760682	12	48512285	C	A	0.1901	0.017	0.003	0.00565	0.01375	32.1109
rs4820091	22	21940189	T	G	0.7969	0.018	0.003	-0.00647	0.0108	35.9998
rs499974	11	75455021	A	C	0.1759	0.029	0.003	0.00395	0.01186	93.4439
rs556107	1	234853059	T	C	0.5391	0.021	0.003	0.00192	0.01009	48.9997
rs55696093	7	21605973	G	A	0.21	0.026	0.003	-0.00374	0.01217	75.1106
rs57720904	7	28180099	C	T	0.9081	0.03	0.005	-0.02284	0.01648	35.9998
rs58699591	7	97876704	C	T	0.8413	0.023	0.003	0.02552	0.01539	58.7774
rs59616136	19	17252041	A	G	0.1058	0.036	0.004	0.02824	0.02096	80.9995
rs61791066	3	170713380	C	T	0.1243	0.031	0.004	0.01571	0.01475	60.0621
rs61984409	14	64730021	A	C	0.641	0.015	0.003	0.0025	0.01048	24.9998
rs6431625	2	234637912	C	T	0.3797	0.598	0.002	0.00678	0.01012	89400.4
rs6682423	1	63171063	T	C	0.6555	0.021	0.003	0.00032	0.0107	48.9997
rs67257650	15	73979507	T	C	0.4181	0.017	0.003	-0.00635	0.0105	32.1109
rs6731997	2	232560411	G	A	0.2108	0.017	0.003	-0.01882	0.01212	32.1109
rs6734238	2	113841030	A	G	0.5906	0.023	0.003	-0.00709	0.01088	58.7774
rs676388	19	49211969	C	T	0.5274	0.021	0.003	0.00196	0.01013	48.9997
rs6869704	5	122833667	T	C	0.5451	0.017	0.003	0.00432	0.01	32.1109
rs6986601	8	131026260	G	A	0.5371	0.014	0.003	-0.00092	0.0101	21.7776
rs7135337	12	121404155	C	A	0.569	0.016	0.003	-0.01363	0.01007	28.4443
rs717662	11	100493995	T	C	0.112	0.026	0.004	-0.03198	0.01798	42.2497
rs7213285	17	27206029	A	G	0.158	0.02	0.003	-0.00213	0.01374	44.4442
rs7222046	17	7806529	G	A	0.4343	0.017	0.003	0.00105	0.01008	32.1109
rs7223257	17	61787684	T	C	0.6571	0.017	0.003	0.01893	0.01015	32.1109
rs72835688	6	12811955	C	T	0.9417	0.03	0.005	0.03066	0.02263	35.9998
rs73080739	12	20761863	G	A	0.8945	0.033	0.004	0.00541	0.01444	68.0621
rs76895963	12	4384844	G	T	0.0203	0.062	0.01	0.05923	0.02992	38.4398
rs788644	1	202256962	G	T	0.5288	0.018	0.003	0.01515	0.01005	35.9998
rs79170239	9	94044272	T	C	0.1831	0.035	0.003	0.00392	0.0116	136.11
rs79800919	4	124787383	G	A	0.8885	0.026	0.004	-0.02515	0.01594	42.2497
rs8192870	8	59412066	T	G	0.3444	0.015	0.003	-0.00719	0.01021	24.9998
rs855791	22	37462936	G	A	0.5769	0.028	0.003	-0.00158	0.01046	87.1106
rs857725	1	158607935	T	G	0.7304	0.033	0.003	-0.0053	0.01053	120.999
rs9826148	3	114464858	C	T	0.8911	0.026	0.004	0.02026	0.01622	42.2497

## Sheet: STable 4
Supplementary Table 3. Summary statistics for the SNPs associated with bilirubin and their association with HF in the Biobank Japan cohort.
					Bilirubin		HF
SNP	Chr	Effect allele	Other allele	EAF	Beta	SE	Beta	SE	F statistic
rs12993249	2	G	A	0.378	0.06	0.003	-0.00681931	0.0173091	399.969
rs12996139	2	A	C	0.104	0.033	0.004	-0.00877466	0.0218731	68.0571
rs2119503	2	A	G	0.117	0.053	0.004	-0.0475891	0.0261425	175.549
rs4149014	12	G	T	0.228	-0.024	0.003	0.00686226	0.0189101	63.995
rs4663344	2	T	G	0.38	-0.015	0.003	0.010192	0.0154366	24.998
rs55686299	2	G	T	0.065	0.048	0.005	-0.0198257	0.0363993	92.1527
rs55986512	12	A	G	0.089	0.062	0.005	-0.0247888	0.0263295	153.748
rs6723506	2	G	A	0.027	0.169	0.008	-0.00723311	0.0663793	446.23
rs73233620	12	G	T	0.199	0.057	0.003	0.00753342	0.0184506	360.972

## Sheet: STable 5
Supplementary Table 4. Sample overlap between data sources of exposures and outcomes.
Population	Exposure	Outcome	Sample overlap
European	Bilirubin(UK biobank)	HF(HERMES)	0.325
	Bilirubin(UK biobank)	HF(FinnGen)	0
East Asian	Bilirubin(KoGES)	HF(Biobank Japan)	0

## Sheet: STable 6
Supplementary Table 6. Association between genetically determined direct and indirect bilirubin with heart failure in East Asian Population.
Exposure	Number of SNP	OR (95% CI)	P value
Direct bilirubin	1	1.04 (0.98-1.10)	0.162
Indirect blirubin	1	1.04 (0.99-1.09)	0.155
